# Supplementary material for: Role of PATJ in stroke prognosis by modulating endothelial to mesenchymal transition through the Hippo/Notch/PI3K axis
Source: Springer Nature journal article supplement (doi:10.1038/s41420-024-01857-z), 2024-02-17

# SUPPLEMENTAL MATERIAL

## Title: Role of PATJ in Stroke Prognosis by modulating Endothelial to Mesenchymal

### 1. SUPPLEMENTARY TABLES & FIGURES

Suppl. Table 1: Differentially expressed genes (FDR P-value  $\leq 0.05$ ) between CTL and PATJ KD cells with Log2 fold-change  $\leq 0.4$  (A) and  $\geq 0.4$  (B).

| SYMBOL     | logFC | AveExpr | t      | P.Value | adj.P.Val | B    | GENENAME                                                                               |
|------------|-------|---------|--------|---------|-----------|------|----------------------------------------------------------------------------------------|
| ITGA2      | -4.55 | 9.15    | -17.59 | 0.00    | 0.00      | 8.65 | integrin membrane protein 2A                                                           |
| MGP        | -4.20 | 6.80    | -17.22 | 0.00    | 0.00      | 8.53 | matrix Gla protein                                                                     |
| AK5        | -4.08 | 7.16    | -8.46  | 0.00    | 0.01      | 3.67 | adenylate kinase 5                                                                     |
| WASF3      | -4.03 | 7.10    | -10.31 | 0.00    | 0.00      | 5.14 | WAS protein family, member 3                                                           |
| MIR99AHG   | -3.27 | 9.29    | -13.62 | 0.00    | 0.00      | 7.08 | mir-99a-let-1c cluster host gene                                                       |
| FOXP1      | -3.13 | 8.08    | -5.80  | 0.00    | 0.05      | 0.86 | forkhead box G1                                                                        |
| HOXC10     | -3.12 | 5.74    | -16.92 | 0.00    | 0.00      | 8.43 | homeobox C10                                                                           |
| HOXC9      | -3.01 | 6.96    | -13.79 | 0.00    | 0.00      | 7.17 | homeobox C9                                                                            |
| FRMP9L     | -3.00 | 5.15    | -12.09 | 0.00    | 0.00      | 9.58 | FERM and PDZ domain containing 4                                                       |
| OSBP1L     | -2.94 | 5.90    | -14.60 | 0.00    | 0.00      | 7.54 | oxysterol binding protein-like 6                                                       |
| RUNX3      | -2.92 | 7.13    | -15.25 | 0.00    | 0.00      | 7.81 | runt-related transcription factor 3                                                    |
| ROBO1      | -2.89 | 5.72    | -15.05 | 0.00    | 0.00      | 7.73 | roundabout guidance receptor 1                                                         |
| BMF6       | -2.89 | 7.03    | -8.84  | 0.00    | 0.00      | 4.80 | bone morphogenetic protein 6                                                           |
| SULT1E1    | -2.88 | 6.00    | -14.54 | 0.00    | 0.00      | 7.51 | sulfotransferase family 1E member 1                                                    |
| TNIK       | -2.81 | 5.65    | -16.43 | 0.00    | 0.00      | 8.26 | TRAF2 and NCK interacting kinase                                                       |
| GFRAL      | -2.77 | 7.44    | -9.27  | 0.00    | 0.00      | 4.36 | GDNF family receptor alpha 1                                                           |
| HOXC8      | -2.62 | 6.74    | -15.53 | 0.00    | 0.00      | 6.60 | homeobox C8                                                                            |
| BICC1      | -2.33 | 6.76    | -9.45  | 0.00    | 0.00      | 4.50 | Bicc family RNA binding protein 1                                                      |
| CA2        | -2.31 | 6.73    | -13.52 | 0.00    | 0.00      | 7.03 | carbonic anhydrase II                                                                  |
| ID1        | -2.28 | 8.53    | -8.74  | 0.00    | 0.00      | 3.91 | inhibitor of DNA binding 1, dominant negative helix-loop-helix protein                 |
| SLIT4      | -2.20 | 6.50    | -9.77  | 0.00    | 0.00      | 4.75 | SLIT and NTN1-like family, member 4                                                    |
| PDE10A     | -2.12 | 6.40    | -17.50 | 0.00    | 0.00      | 8.63 | phosphodiesterase 10A                                                                  |
| SYT15      | -2.09 | 7.92    | -9.42  | 0.00    | 0.00      | 4.48 | synaptotagmin XV                                                                       |
| FIGL1      | -2.08 | 7.06    | -10.59 | 0.00    | 0.00      | 5.33 | fibrinogen-like 2                                                                      |
| LINC01     | -2.03 | 5.68    | -15.53 | 0.00    | 0.00      | 7.92 | LIM and calponin homology domains 1                                                    |
| TEX15      | -1.92 | 4.90    | -15.70 | 0.00    | 0.00      | 7.99 | testis expressed 15                                                                    |
| FARP1      | -1.83 | 8.26    | -8.91  | 0.00    | 0.00      | 4.06 | FERM, ARH/RhoGEF and pleckstrin domain protein 1                                       |
| ZHX4       | -1.78 | 7.30    | -7.70  | 0.00    | 0.01      | 2.96 | zinc finger homeobox 4                                                                 |
| SKD2       | -1.74 | 6.86    | -11.09 | 0.00    | 0.00      | 6.66 | SKY12                                                                                  |
| BGN        | -1.62 | 10.76   | -18.53 | 0.00    | 0.00      | 8.94 | biglycan                                                                               |
| SFRP1      | -1.61 | 5.99    | -6.60  | 0.00    | 0.05      | 0.62 | secreted frizzled-related protein 1                                                    |
| HOXC6      | -1.57 | 6.02    | -9.03  | 0.00    | 0.00      | 4.16 | homeobox C6                                                                            |
| TMOD1      | -1.56 | 7.25    | -7.26  | 0.00    | 0.01      | 2.52 | tropomodulin 1                                                                         |
| PHGDH      | -1.51 | 6.97    | -11.97 | 0.00    | 0.00      | 6.20 | phosphoglycerate dehydrogenase                                                         |
| SEMA3E     | -1.50 | 4.82    | -8.07  | 0.00    | 0.01      | 3.31 | sema domain, immunoglobulin domain (Ig), short basic domain, secreted, (semaphorin) 3E |
| SYT15      | -1.41 | 7.96    | -6.97  | 0.00    | 0.02      | 2.22 | Homo sapiens synaptotagmin XV (SYT15), transcript variant a, mRNA                      |
| TRD        | -1.40 | 4.30    | -8.73  | 0.00    | 0.00      | 3.90 | tropothione                                                                            |
| KCNIP1     | -1.36 | 5.09    | -14.48 | 0.00    | 0.00      | 7.48 | Kv channel interacting protein 1                                                       |
| TAF7L      | -1.35 | 5.31    | -11.25 | 0.00    | 0.00      | 5.77 | TATA box binding protein associated factor 7 like                                      |
| ADORA1     | -1.35 | 7.31    | -7.21  | 0.00    | 0.01      | 2.47 | adenosine A1 receptor                                                                  |
| PAK1       | -1.28 | 5.45    | -8.65  | 0.00    | 0.02      | 1.87 | p21 protein (G12/G13/Rac)-activated kinase 3                                           |
| WNT2B      | -1.17 | 6.91    | -6.15  | 0.00    | 0.04      | 1.29 | wingless-type MMTV integration site family, member 2B                                  |
| CNG1L1     | -1.16 | 5.21    | -8.22  | 0.00    | 0.01      | 3.45 | cingulin-like 1                                                                        |
| HN1S1      | -1.15 | 7.71    | -8.87  | 0.00    | 0.00      | 4.02 | Meis homeobox 1                                                                        |
| LIM1A      | -1.14 | 10.15   | -8.55  | 0.00    | 0.00      | 4.57 | LIM domain and actin binding 1                                                         |
| AR         | -1.14 | 6.29    | -6.49  | 0.00    | 0.03      | 1.69 | androgen receptor                                                                      |
| SEMA3D     | -1.12 | 5.31    | -6.80  | 0.00    | 0.05      | 0.86 | sema domain, immunoglobulin domain (Ig), short basic domain, secreted, (semaphorin) 3D |
| PCDH1      | -1.08 | 7.50    | -9.21  | 0.00    | 0.00      | 4.30 | protocadherin 1                                                                        |
| RPRR       | -1.05 | 8.98    | -8.58  | 0.00    | 0.01      | 3.78 | retinitis pigmentosa GTPase regulator                                                  |
| PREX2      | -1.05 | 5.45    | -7.85  | 0.00    | 0.01      | 3.11 | phosphatidylinositol-3,4,5-trisphosphate-dependent Rac exchange factor 2               |
| PFN2       | -1.00 | 9.76    | -6.62  | 0.00    | 0.05      | 0.64 | profilin 2                                                                             |
| FHDC3      | -0.97 | 6.98    | -6.02  | 0.00    | 0.02      | 3.27 | formin homology 2 domain containing 3                                                  |
| ANKRD50    | -0.97 | 6.59    | -7.59  | 0.00    | 0.01      | 2.85 | ankyrin repeat domain 50                                                               |
| TPSAB1B    | -0.95 | 6.83    | -7.02  | 0.00    | 0.02      | 2.27 | tetraspanin 18                                                                         |
| DCHS1      | -0.95 | 5.33    | -6.77  | 0.00    | 0.02      | 2.00 | dachshun cadherin-related 1                                                            |
| CDH3       | -0.95 | 7.57    | -6.17  | 0.00    | 0.03      | 1.31 | cadherin 3, type 1, P-cadherin (placental)                                             |
| FHDC1      | -0.94 | 5.36    | -6.05  | 0.00    | 0.04      | 1.18 | FH2 domain containing 1                                                                |
| ALDH1A1    | -0.91 | 5.14    | -7.08  | 0.00    | 0.02      | 2.34 | aldehyde dehydrogenase 1 family, member A1                                             |
| FAM218A    | -0.90 | 5.66    | -7.35  | 0.00    | 0.01      | 2.61 | family with sequence similarity 218, member A                                          |
| SLITRS     | -0.89 | 5.70    | -6.21  | 0.00    | 0.00      | 4.99 | SLIT and NTN1-like family, member 5                                                    |
| LYAR6      | -0.88 | 9.60    | -5.95  | 0.00    | 0.04      | 1.06 | lysophosphatidic acid receptor 6                                                       |
| SYNE2      | -0.85 | 8.46    | -6.47  | 0.00    | 0.03      | 1.67 | spectrin repeat containing, nuclear envelope 2                                         |
| SCG5       | -0.84 | 6.06    | -6.09  | 0.00    | 0.04      | 1.22 | secretogranin V                                                                        |
| CHD3       | -0.83 | 8.04    | -6.45  | 0.00    | 0.03      | 1.65 | chromodomain helicase DNA binding protein 3                                            |
| RP11-380G5 | -0.83 | 8.81    | -5.60  | 0.00    | 0.05      | 0.62 | —                                                                                      |
| ARHGAP6    | -0.82 | 5.88    | -7.49  | 0.00    | 0.01      | 2.76 | Rho GTPase activating protein 6                                                        |
| CD109      | -0.82 | 7.51    | -6.54  | 0.00    | 0.03      | 1.74 | CD109 molecule                                                                         |
| FAM103B    | -0.82 | 7.37    | -6.25  | 0.00    | 0.03      | 1.41 | family with sequence similarity 101, member B                                          |
| ORFPR      | -0.82 | 6.53    | -6.08  | 0.00    | 0.04      | 1.21 | pyroglutamylated RFamide peptide receptor                                              |
| PCDH9      | -0.79 | 6.36    | -10.55 | 0.00    | 0.00      | 5.31 | protocadherin 9                                                                        |
| CBLN1      | -0.78 | 5.31    | -7.05  | 0.00    | 0.02      | 2.30 | cerebellin 2 precursor                                                                 |
| ERBB1      | -0.77 | 10.97   | -6.16  | 0.00    | 0.00      | 4.26 | ERBB receptor feedback inhibitor 1                                                     |
| GLDC       | -0.77 | 6.83    | -8.22  | 0.00    | 0.01      | 3.45 | glycine dehydrogenase (decarboxylating)                                                |
| TMCC3      | -0.77 | 6.10    | -7.50  | 0.00    | 0.01      | 2.77 | transmembrane and coiled-coil domain family 3                                          |
| RNF150     | -0.75 | 5.07    | -8.49  | 0.00    | 0.01      | 3.70 | ring finger protein 150                                                                |
| ZNF14      | -0.75 | 7.89    | -6.44  | 0.00    | 0.03      | 1.63 | zinc finger protein 14                                                                 |
| ZNF718     | -0.74 | 6.97    | -7.73  | 0.00    | 0.01      | 2.99 | zinc finger protein 718                                                                |
| CKADR      | -0.72 | 6.67    | -5.71  | 0.00    | 0.05      | 0.76 | coxsackie virus and adenovirus receptor                                                |
| PTPRM      | -0.71 | 9.97    | -6.35  | 0.00    | 0.03      | 1.53 | protein tyrosine phosphatase, receptor type, M                                         |
| CDNA       | -0.70 | 5.51    | -6.06  | 0.00    | 0.04      | 1.19 | cadherin 4, type 1, R-cadherin (retinal)                                               |
| MPP6       | -0.69 | 8.60    | -6.83  | 0.00    | 0.05      | 0.90 | membrane protein, palmitoylated 6                                                      |
| RNASE1     | -0.69 | 5.91    | -5.77  | 0.00    | 0.05      | 0.83 | ribonuclease, RNase A family 1 (pancreatic)                                            |
| TRX18      | -0.68 | 6.15    | -7.13  | 0.00    | 0.01      | 2.39 | T-box 18                                                                               |
| PKB1       | -0.67 | 4.97    | -6.74  | 0.00    | 0.05      | 0.80 | protein kinase (cAMP-dependent, catalytic) inhibitor beta                              |
| NNMT       | -0.64 | 11.34   | -7.58  | 0.00    | 0.01      | 2.85 | nicotinamide N-methyltransferase                                                       |
| SPARCL1    | -0.64 | 5.02    | -5.77  | 0.00    | 0.05      | 0.83 | SPARC like 1                                                                           |
| FAM195B    | -0.60 | 9.23    | -7.13  | 0.00    | 0.01      | 2.38 | family with sequence similarity 195, member B                                          |
| FNKR1      | -0.56 | 9.14    | -7.82  | 0.00    | 0.01      | 3.08 | interferon gamma receptor 1                                                            |
| RBM53      | -0.56 | 10.13   | -6.66  | 0.00    | 0.05      | 0.69 | RNA binding motif, single stranded interacting protein 3                               |
| SEC14L2    | -0.54 | 6.73    | -5.58  | 0.00    | 0.05      | 0.59 | SEC14-like lipid binding 2                                                             |
| BPGM       | -0.53 | 8.87    | -6.72  | 0.00    | 0.05      | 0.76 | 2,3-bisphosphoglycerate mutase                                                         |
| CCL27      | 0.45  | 7.25    | 6.37   | 0.00    | 0.03      | 1.55 | chemokine (C-C motif) ligand 27                                                        |
| MSRA       | 0.45  | 8.60    | 6.35   | 0.00    | 0.03      | 1.52 | methionine sulfoxide reductase A                                                       |
| LINC00346  | 0.54  | 6.62    | 5.98   | 0.00    | 0.04      | 1.09 | long intergenic non-protein coding RNA 346                                             |
| DKF1       | 0.57  | 9.63    | 5.85   | 0.00    | 0.05      | 0.93 | 3-oxoacid CoA-transferase 1                                                            |
| DUSP16     | 0.81  | 8.91    | 6.66   | 0.00    | 0.05      | 0.69 | acylphosphatase 2, muscle type                                                         |
| DUSP16     | 0.61  | 6.64    | 5.77   | 0.00    | 0.05      | 0.82 | dual specificity phosphatase 16                                                        |
| C10orf25   | 0.62  | 7.45    | 5.72   | 0.00    | 0.05      | 0.77 | chromosome 10 open reading frame 25                                                    |
| AHR        | 0.65  | 10.88   | 7.16   | 0.00    | 0.01      | 2.42 | aryl hydrocarbon receptor                                                              |
| QDPR       | 0.65  | 7.74    | 7.14   | 0.00    | 0.01      | 2.39 | quinoid dihydropteridine reductase                                                     |
| PTGFR      | 0.65  | 5.52    | 5.73   | 0.00    | 0.05      | 0.78 | prostaglandin F receptor (FP)                                                          |
| TRPM2      | 0.66  | 7.70    | 5.78   | 0.00    | 0.05      | 0.85 | transient receptor potential cation channel, subfamily M, member 2                     |
| LGALS1     | 0.67  | 9.12    | 8.05   | 0.00    | 0.01      | 3.30 | lectin, galactoside-binding-like                                                       |
| GABBR1     | 0.70  | 8.48    | 6.46   | 0.00    | 0.03      | 1.65 | gamma-aminobutyric acid (GABA) B receptor, 1                                           |
| ARHGEP35   | 0.70  | 8.46    | 5.75   | 0.00    | 0.05      | 0.81 | Rho guanine nucleotide exchange factor 35                                              |
| TSACC      | 0.74  | 7.34    | 5.72   | 0.00    | 0.05      | 0.76 | TSSK6 activating co-chaperone                                                          |
| DUSP16     | 0.81  | 8.91    | 6.66   | 0.00    | 0.05      | 0.69 | dual specificity phosphatase 16                                                        |
| DUSP16     | 0.83  | 7.62    | 6.14   | 0.00    | 0.04      | 1.28 | dual specificity phosphatase 16                                                        |
| APLF       | 0.85  | 7.44    | 6.77   | 0.00    | 0.02      | 2.00 | aplatin and PNKP like factor                                                           |
| NEU1       | 0.86  | 9.51    | 7.24   | 0.00    | 0.01      | 2.51 | sialidase 1 (lysosomal sialidase)                                                      |
| GREM1      | 0.88  | 7.32    | 5.79   | 0.00    | 0.05      | 0.86 | gremlin 1, DAN family BMP antagonist [Source:HGNC Symbol;Acc:HGNC:2001]                |
| OCLN       | 0.92  | 8.61    | 8.17   | 0.00    | 0.01      | 3.41 | occludin                                                                               |
| C7orf31    | 0.96  | 7.61    | 6.20   | 0.00    | 0.03      | 1.35 | chromosome 7 open reading frame 31                                                     |
| PDZD2      | 0.99  | 8.11    | 13.59  | 0.00    | 0.00      | 7.07 | PDZ domain containing 2                                                                |
| NFPA2      | 1.01  | 7.74    | 6.10   | 0.00    | 0.04      | 1.23 | NFPA-like domain containing 2                                                          |
| SERINC2    | 1.04  | 9.22    | 7.75   | 0.00    | 0.01      | 3.01 | serine incorporator 2                                                                  |
| PDE4DIP    | 1.09  | 7.58    | 10.06  | 0.00    | 0.00      | 4.96 | phosphodiesterase 4D interacting protein                                               |
| TRMG171    | 1.21  | 10.06   | 6.06   | 0.00    | 0.04      | 1.19 | transmembrane protein 171                                                              |
| GPA2       | 1.31  | 7.68    | 8.85   | 0.00    | 0.00      | 4.01 | glycerol-3-phosphate acyltransferase 2, mitochondrial                                  |
| LURAP1L    | 1.32  | 4.91    | 8.88   | 0.00    | 0.00      | 4.03 | leucine rich adaptor protein 1-like 5                                                  |
| NAP1L5     | 1.39  | 7.35    | 10.46  | 0.00    | 0.00      | 5.24 | nucleosome assembly protein 1-like 5                                                   |
| CYP4V2     | 1.43  | 5.70    | 9.35   | 0.00    | 0.00      | 4.42 | cytochrome P450, family 4, subfamily V, polypeptide 2                                  |
| ME2        | 1.59  | 6.75    | 13.80  | 0.00    | 0.00      | 7.17 | midline 2                                                                              |
| OSBP1LA    | 1.62  | 7.15    | 5.59   | 0.00    | 0.05      | 0.60 | oxysterol binding protein-like 1A                                                      |
| ELOVL7     | 1.84  | 6.08    | 8.32   | 0.00    | 0.01      | 3.55 | ELOVL fatty acid elongase 7                                                            |
| LIPH       | 1.99  | 7.22    | 18.04  | 0.00    | 0.00      | 8.80 | lipase, member H                                                                       |
| RASGEF3    | 2.00  | 6.37    | 5.72   | 0.00    | 0.05      | 0.76 | RAS guanyl releasing protein 3 (calcium and DAG-regulated)                             |
| NOSTRIN    | 2.02  | 6.90    | 10.02  | 0.00    | 0.00      | 4.93 | nitric oxide synthase trafficking                                                      |

31 **Suppl. Table 2.** Over-Representation Analysis (ORA) of functional categories with an  
 32 FDR-cut off of 0.05 obtained using WikiPathways.

| ID     | Description | GeneRatio                                                               | BgRatio  | pvalue   | p.adjust    | qvalue      |             |
|--------|-------------|-------------------------------------------------------------------------|----------|----------|-------------|-------------|-------------|
| WP1984 | WP1984      | Integrated breast cancer pathway                                        | 151/6764 | 155/7856 | 1,3267E-06  | 0,000388256 | 0,00028765  |
| WP3888 | WP3888      | VEGFA-VEGFR2 signaling pathway                                          | 409/6764 | 439/7856 | 1,35281E-06 | 0,000388256 | 0,00028765  |
| WP437  | WP437       | EGF/EGFR signaling pathway                                              | 159/6764 | 164/7856 | 2,30651E-06 | 0,000441313 | 0,000326958 |
| WP366  | WP366       | TGF-beta signaling pathway                                              | 130/6764 | 133/7856 | 3,7121E-06  | 0,000532687 | 0,000394655 |
| WP3932 | WP3932      | Focal adhesion: PI3K-Akt-mTOR-signaling pathway                         | 290/6764 | 309/7856 | 8,36393E-06 | 0,000960179 | 0,000711374 |
| WP5124 | WP5124      | Alzheimer's disease                                                     | 254/6764 | 270/7856 | 1,7966E-05  | 0,001489378 | 0,001103445 |
| WP382  | WP382       | MAPK signaling pathway                                                  | 235/6764 | 249/7856 | 1,81631E-05 | 0,001489378 | 0,001103445 |
| WP236  | WP236       | Adipogenesis                                                            | 127/6764 | 131/7856 | 2,67026E-05 | 0,00170503  | 0,001263217 |
| WP306  | WP306       | Focal adhesion                                                          | 192/6764 | 202/7856 | 2,67339E-05 | 0,00170503  | 0,001263217 |
| WP2064 | WP2064      | Neural crest differentiation                                            | 100/6764 | 102/7856 | 3,28646E-05 | 0,001886427 | 0,00139761  |
| WP4806 | WP4806      | EGFR tyrosine kinase inhibitor resistance                               | 83/6764  | 84/7856  | 4,75356E-05 | 0,002480496 | 0,001837742 |
| WP481  | WP481       | Insulin signaling                                                       | 154/6764 | 161/7856 | 5,71858E-05 | 0,002735386 | 0,002026584 |
| WP45   | WP45        | G1 to S cell cycle control                                              | 64/6764  | 64/7856  | 6,63801E-05 | 0,002930937 | 0,002171463 |
| WP179  | WP179       | Cell cycle                                                              | 118/6764 | 122/7856 | 7,96663E-05 | 0,003169756 | 0,002348398 |
| WP2853 | WP2853      | Endoderm differentiation                                                | 140/6764 | 146/7856 | 8,28333E-05 | 0,003169756 | 0,002348398 |
| WP231  | WP231       | TNF-alpha signaling pathway                                             | 92/6764  | 94/7856  | 9,46153E-05 | 0,003394324 | 0,002514775 |
| WP4787 | WP4787      | Osteoblast differentiation and related diseases                         | 116/6764 | 120/7856 | 0,000101286 | 0,003419893 | 0,002533719 |
| WP4754 | WP4754      | IL-18 signaling pathway                                                 | 260/6764 | 279/7856 | 0,000119551 | 0,003705214 | 0,002745106 |
| WP4239 | WP4239      | Epithelial to mesenchymal transition in colorectal cancer               | 157/6764 | 165/7856 | 0,000125627 | 0,003705214 | 0,002745106 |
| WP4172 | WP4172      | PI3K-Akt signaling pathway                                              | 319/6764 | 345/7856 | 0,000129102 | 0,003705214 | 0,002745106 |
| WP2037 | WP2037      | Prolactin signaling pathway                                             | 75/6764  | 76/7856  | 0,000145173 | 0,003968075 | 0,002939854 |
| WP51   | WP51        | Regulation of actin cytoskeleton                                        | 144/6764 | 151/7856 | 0,000169151 | 0,00441331  | 0,003269718 |
| WP4659 | WP4659      | Gastrin signaling pathway                                               | 110/6764 | 114/7856 | 0,000206773 | 0,004955879 | 0,003671695 |
| WP2446 | WP2446      | Retinoblastoma gene in cancer                                           | 86/6764  | 88/7856  | 0,000207214 | 0,004955879 | 0,003671695 |
| WP5087 | WP5087      | Malignant pleural mesothelioma                                          | 393/6764 | 429/7856 | 0,000223395 | 0,005108703 | 0,003784919 |
| WP3584 | WP3584      | MECP2 and associated Rett syndrome                                      | 71/6764  | 72/7856  | 0,0002527   | 0,005108703 | 0,003784919 |
| WP4255 | WP4255      | Non-small cell lung cancer                                              | 71/6764  | 72/7856  | 0,0002527   | 0,005108703 | 0,003784919 |
| WP2018 | WP2018      | RANKL/RANK signaling pathway                                            | 55/6764  | 55/7856  | 0,000258105 | 0,005108703 | 0,003784919 |
| WP2272 | WP2272      | Pathogenic Escherichia coli infection                                   | 55/6764  | 55/7856  | 0,000258105 | 0,005108703 | 0,003784919 |
| WP23   | WP23        | B cell receptor signaling pathway                                       | 95/6764  | 98/7856  | 0,000313492 | 0,005998154 | 0,004443892 |
| WP2380 | WP2380      | Brain-derived neurotrophic factor (BDNF) signaling pathway              | 137/6764 | 144/7856 | 0,000354994 | 0,006573113 | 0,004869866 |
| WP3303 | WP3303      | RAC1/PAK1/p38/MMP2 pathway                                              | 68/6764  | 69/7856  | 0,000382215 | 0,006678091 | 0,004947641 |
| WP4666 | WP4666      | Hepatitis B infection                                                   | 146/6764 | 154/7856 | 0,000390889 | 0,006678091 | 0,004947641 |
| WP2261 | WP2261      | Glioblastoma signaling pathways                                         | 81/6764  | 83/7856  | 0,000395566 | 0,006678091 | 0,004947641 |
| WP4685 | WP4685      | Melanoma                                                                | 67/6764  | 68/7856  | 0,000438571 | 0,007192558 | 0,005328797 |
| WP4262 | WP4262      | Breast cancer pathway                                                   | 148/6764 | 157/7856 | 0,000828657 | 0,01321247  | 0,009788809 |
| WP4155 | WP4155      | Endometrial cancer                                                      | 62/6764  | 63/7856  | 0,000869629 | 0,013491001 | 0,009995167 |
| WP4263 | WP4263      | Pancreatic adenocarcinoma pathway                                       | 86/6764  | 89/7856  | 0,000931704 | 0,014073628 | 0,010426821 |
| WP2034 | WP2034      | Leptin signaling pathway                                                | 74/6764  | 76/7856  | 0,000966759 | 0,014228715 | 0,010541722 |
| WP5072 | WP5072      | Modulators of TCR signaling and T cell activation                       | 60/6764  | 61/7856  | 0,001141749 | 0,016384098 | 0,012138594 |
| WP4217 | WP4217      | Ebola virus pathway in host                                             | 125/6764 | 132/7856 | 0,001217583 | 0,016613469 | 0,01230853  |
| WP4946 | WP4946      | DNA repair pathways, full network                                       | 115/6764 | 121/7856 | 0,001242312 | 0,016613469 | 0,01230853  |
| WP4216 | WP4216      | Chromosomal and microsatellite instability in colorectal cancer         | 72/6764  | 74/7856  | 0,001244563 | 0,016613469 | 0,01230853  |
| WP5053 | WP5053      | Development of ureteric collection system                               | 59/6764  | 60/7856  | 0,001307773 | 0,016614613 | 0,012309378 |
| WP4658 | WP4658      | Small cell lung cancer                                                  | 94/6764  | 98/7856  | 0,001312516 | 0,016614613 | 0,012309378 |
| WP254  | WP254       | Apoptosis                                                               | 83/6764  | 86/7856  | 0,001331485 | 0,016614613 | 0,012309378 |
| WP4352 | WP4352      | Ciliary landscape                                                       | 204/6764 | 220/7856 | 0,001439293 | 0,017577749 | 0,013022943 |
| WP4321 | WP4321      | Thermogenesis                                                           | 103/6764 | 108/7856 | 0,001527809 | 0,017903461 | 0,013264255 |
| WP3931 | WP3931      | Embryonic stem cell pluripotency pathways                               | 113/6764 | 119/7856 | 0,001528344 | 0,017903461 | 0,013264255 |
| WP4396 | WP4396      | Nonalcoholic fatty liver disease                                        | 150/6764 | 160/7856 | 0,001630571 | 0,018718953 | 0,013868434 |
| WP2036 | WP2036      | TNF-related weak inducer of apoptosis (TWEAK) signaling pathway         | 42/6764  | 42/7856  | 0,001829682 | 0,02019687  | 0,014963388 |
| WP466  | WP466       | DNA replication                                                         | 42/6764  | 42/7856  | 0,001829682 | 0,02019687  | 0,014963388 |
| WP2359 | WP2359      | Parkin-ubiquitin proteasomal system pathway                             | 68/6764  | 70/7856  | 0,00205433  | 0,02248781  | 0,016483601 |
| WP2355 | WP2355      | Corticotropin-releasing hormone signaling pathway                       | 89/6764  | 93/7856  | 0,002294393 | 0,024388544 | 0,018068901 |
| WP3937 | WP3937      | Microglia pathogen phagocytosis pathway                                 | 40/6764  | 40/7856  | 0,002472283 | 0,025801648 | 0,019115837 |
| WP395  | WP395       | IL-4 signaling pathway                                                  | 54/6764  | 55/7856  | 0,002568358 | 0,025894157 | 0,019184375 |
| WP5115 | WP5115      | Network map of SARS-CoV-2 signaling pathway                             | 205/6764 | 222/7856 | 0,002571371 | 0,025894157 | 0,019184375 |
| WP138  | WP138       | Androgen receptor signaling pathway                                     | 87/6764  | 91/7856  | 0,00286048  | 0,027829079 | 0,020617913 |
| WP69   | WP69        | T-cell receptor (TCR) signaling pathway                                 | 87/6764  | 91/7856  | 0,00286048  | 0,027829079 | 0,020617913 |
| WP411  | WP411       | mRNA processing                                                         | 125/6764 | 133/7856 | 0,003040461 | 0,029087079 | 0,021549936 |
| WP536  | WP536       | Calcium regulation in cardiac cells                                     | 142/6764 | 152/7856 | 0,003334311 | 0,031375323 | 0,023245242 |
| WP4656 | WP4656      | Joubert syndrome                                                        | 74/6764  | 77/7856  | 0,003806053 | 0,035236687 | 0,026106036 |
| WP3614 | WP3614      | Photodynamic therapy-induced HIF-1 survival signaling                   | 37/6764  | 37/7856  | 0,003882529 | 0,035374149 | 0,026207879 |
| WP4018 | WP4018      | Clear cell renal cell carcinoma pathways                                | 83/6764  | 87/7856  | 0,004422628 | 0,039665442 | 0,029387197 |
| WP289  | WP289       | Myometrial relaxation and contraction pathways                          | 147/6764 | 158/7856 | 0,004598611 | 0,040331041 | 0,029880324 |
| WP615  | WP615       | Senescence and autophagy in cancer                                      | 102/6764 | 108/7856 | 0,004637367 | 0,040331041 | 0,029880324 |
| WP61   | WP61        | Notch signaling pathway (Netpath)                                       | 61/6764  | 63/7856  | 0,004867962 | 0,041704631 | 0,030897985 |
| WP5094 | WP5094      | Orexin receptor pathway                                                 | 144/6764 | 155/7856 | 0,005905013 | 0,04947375  | 0,036653943 |
| WP4746 | WP4746      | Thyroid hormones production and peripheral downstream signaling effects | 90/6764  | 95/7856  | 0,005947193 | 0,04947375  | 0,036653943 |

33

34 **Suppl. Table 3.** Most significant pathways (Adjusted P-val <0,05) modulated due to  
 35 *PATJ* KD identified through Reactome.

| Pathway                                                                  | Total modulated genes | Upregulated Genes                   | Downregulated Genes2                                                          | Significance | p-value  |
|--------------------------------------------------------------------------|-----------------------|-------------------------------------|-------------------------------------------------------------------------------|--------------|----------|
| Ectoderm differentiation                                                 | 9                     | CCL2, TRPM2, EDAR                   | FZD4, GRAMD1B, ZFH04, PTPRB, SKIL, SOX2                                       | 3,15         | 0,000716 |
| G protein signaling pathways                                             | 7                     | PRKAR1B, PDE4A, PDE1B, AKAP3, PRKD1 | PDE4B, GNG4                                                                   | 3,02         | 0,000959 |
| Photodynamic therapy-induced unfolded protein response                   | 4                     | DDIT3, NARS, ATF3                   | SULT1E1                                                                       | 2,98         | 0,001041 |
| Ras signaling                                                            | 10                    | PLCG2, RASGRF3, KSR2                | KDR, RASGRF1, GNG4, RASSF5, PAK3, ETS2, PLCE1                                 | 2,92         | 0,001209 |
| Transcriptional cascade regulating adipogenesis                          | 3                     | DDIT3                               | GATA2, KLF5                                                                   | 2,92         | 0,001213 |
| Myometrial relaxation and contraction pathways                           | 9                     | PLCG2, PRKD1, PRKAR1B, AIF3         | PKIB, RGS9, ETS2, PDE4B, GNG4                                                 | 2,86         | 0,001192 |
| Epithelial to mesenchymal transition in colorectal cancer                | 9                     | OCLN                                | NRP2, CDKL2, JD1, CLDN5, COL4A5, COL4A6, WNT2B, FZD4                          | 2,76         | 0,001731 |
| TGF-beta signaling pathway                                               | 8                     | NEDD4L, STAMBPL1, ATF3              | TERT, SKIL, MEF2C, SIK1, ITGA2                                                | 2,67         | 0,002144 |
| Pre-implantation embryo                                                  | 5                     | DDIT3, BATF3                        | NR3C2, GATA2, SOX2                                                            | 2,49         | 0,003201 |
| VEGFA-VEGFR2 signaling pathway                                           | 16                    | PRKD1, CCL2, OCLN, KATNAL2, PDE4DIP | NRP2, MEF2C, S1PR1, TAL1, GATA2, TRAF3IP2, HTRA1, KANK1, CGNL1, MICAL2, TMOD1 | 2,38         | 0,004168 |
| Lung fibrosis                                                            | 5                     | CCL2, GREM1                         | SKIL, EDN1, TERT                                                              | 2,34         | 0,004553 |
| Hair follicle development: cytodifferentiation - part 3 of 3             | 6                     | PERP, FST                           | SFRP1, SOX2, RUNX3, BMP6                                                      | 2,32         | 0,004747 |
| Hippo-Merlin signaling dysregulation                                     | 8                     | PRKAR1B                             | CDH3, CDH4, ITGA2, ITGB8, KDR, PAK3, PPP1R14A                                 | 2,28         | 0,005271 |
| Itf e effect on hepcidin production                                      | 2                     |                                     | BMP6, ID1                                                                     | 2,25         | 0,005673 |
| Sudden infant death syndrome (SIDS) susceptibility pathways              | 8                     | PRKAR1B, MYB                        | HES1, MEF2C, RUNX3, GATA2, AR, SOX2                                           | 2,22         | 0,006016 |
| Glucocorticoid receptor pathway                                          | 5                     | CCL2, PRKG4                         | PDE4B, PIK4, ALDOX5AP                                                         | 2,15         | 0,007066 |
| Exercise-induced circadian regulation                                    | 4                     | HLA-DMA                             | GSTM3, CLDN5, GFR1                                                            | 2,06         | 0,008745 |
| Folate-alcohol and cancer pathway hypotheses                             | 2                     |                                     | ALDH1A3, CBS                                                                  | 2,02         | 0,009511 |
| Phosphodiesterases in neuronal function                                  | 4                     | PDE1B, PDE4A                        | PDE10A, PDE4B                                                                 | 1,91         | 0,012324 |
| Burn wound healing                                                       | 6                     | CCL2, FST, CD248, IL15              | KDR, PECAM1                                                                   | 1,87         | 0,013594 |
| TGF-beta receptor signaling                                              | 4                     | FST                                 | SMAD6, SKIL, RUNX3                                                            | 1,85         | 0,013983 |
| Mesodermal commitment pathway                                            | 7                     | EXT2                                | ZFH04, KLF5, MEI51, SMAD6, SOX2, FZD4                                         | 1,79         | 0,016084 |
| Clear cell renal cell carcinoma pathways                                 | 5                     | BHLHE41                             | KCNJ2, PTEN, PHGDH, KDR                                                       | 1,79         | 0,016135 |
| White fat cell differentiation                                           | 3                     | DDIT3                               | KLF5, GATA2                                                                   | 1,78         | 0,016597 |
| TGF-beta receptor signaling in skeletal dysplasias                       | 4                     | FST                                 | SMAD6, SKIL, RUNX3                                                            | 1,75         | 0,017709 |
| Purinergic signaling                                                     | 3                     | P2RX4                               | ADORA1, LPAR6                                                                 | 1,74         | 0,018033 |
| Development of ureteric collection system                                | 4                     | FST, GREM1                          | ROBO1, GFR1                                                                   | 1,7          | 0,019782 |
| PodNet: protein-protein interactions in the podocyte                     | 11                    | OCLN                                | SMAD6, EFN1, SULF1, ROBO1, CDH3, PLCE1, ITGA2, KDR, KHDRBS3, COL4A5           | 1,7          | 0,020101 |
| ATF4 activates genes in response to endoplasmic reticulum stress         | 3                     | DDIT3, CCL2, ATF3                   |                                                                               | 1,63         | 0,024445 |
| Olfactory receptor activity                                              | 1                     | OR2B6                               |                                                                               | 1,61         | 0,024551 |
| Endochondral ossification with skeletal dysplasias                       | 4                     |                                     | BMP6, MEF2C, RUNX3, MGFP                                                      | 1,59         | 0,025599 |
| Endochondral ossification                                                | 4                     |                                     | BMP6, MEF2C, RUNX3, MGFP                                                      | 1,59         | 0,025599 |
| GPR40 pathway                                                            | 2                     | PLCG2                               | PLCE1                                                                         | 1,59         | 0,025946 |
| Melanoma                                                                 | 4                     | MITF                                | KDR, PREX2, PTEN                                                              | 1,53         | 0,029533 |
| miRNA in muscle cell differentiation                                     | 3                     | PRKAR1B, PRKD1                      | MEF2C                                                                         | 1,5          | 0,031929 |
| Estrogen metabolism                                                      | 2                     | ARSD                                | SULT1E1                                                                       | 1,44         | 0,036572 |
| Sulfation biotransformation reaction                                     | 2                     | SULT1C2                             | SULT1E1                                                                       | 1,44         | 0,036572 |
| Mammary gland development pathway - Embryonic development (Stage 1 of 4) | 2                     |                                     | SFRP1, TERT                                                                   | 1,44         | 0,036572 |
| MECP2 and associated Rett syndrome                                       | 4                     | FGF5                                | MEF2C, FOXG1, PTEN                                                            | 1,43         | 0,038483 |
| Vitamin D receptor pathway                                               | 7                     | SULT1C2                             | CST6, CLMN, CBS, ID1, SFRP1, BMP6                                             | 1,4          | 0,039435 |
| Prostaglandin synthesis and regulation                                   | 3                     | MITF                                | EDN1, PTGFRN                                                                  | 1,37         | 0,042771 |
| Embryonic stem cell pluripotency pathways                                | 5                     | FGF5                                | FZD4, PTEN, SMAD6, WNT2B                                                      | 1,32         | 0,047442 |
| Phosphoinositides metabolism                                             | 3                     | PLCG2                               | PTEN, PLCE1                                                                   | 1,3          | 0,050048 |
| PI3K-Akt signaling pathway                                               | 11                    | IL7R, FGF5, MYB                     | COL4A5, ITGA2, COL4A6, PTEN, ITGB8, KDR, LPAR6, GNG4                          | 1,29         | 0,050848 |
| Focal adhesion                                                           | 7                     |                                     | ITGB8, KDR, ITGA2, PAK3, PTEN, COL4A6, RASGRF1                                | 1,28         | 0,052052 |
| Deubiquitination                                                         | 2                     | STAMBPL1                            | PTEN                                                                          | 1,27         | 0,053199 |
| GDNF/RET signaling axis                                                  | 2                     | GREM1                               | GFR1                                                                          | 1,24         | 0,05724  |
| Extracellular vesicles in the crosstalk of cardiac cells                 | 2                     |                                     | PTEN, ETS2                                                                    | 1,24         | 0,05724  |

36

37 **Suppl. Fig. 1. (A)** *PATJ* KD clones generated by infection with lentiviral particles harboring  
 38 *PATJ*-shRNA were selected for the 80 kDa *PATJ* specie. **(B)** Clones 1, 2 and 3 were selected for  
 39 further analysis and cell viability and proliferation was assessed with an MTT assay. No  
 40 significant differences were observed between CTL and *PATJ* KD cells after 24 hr growth.  
 41

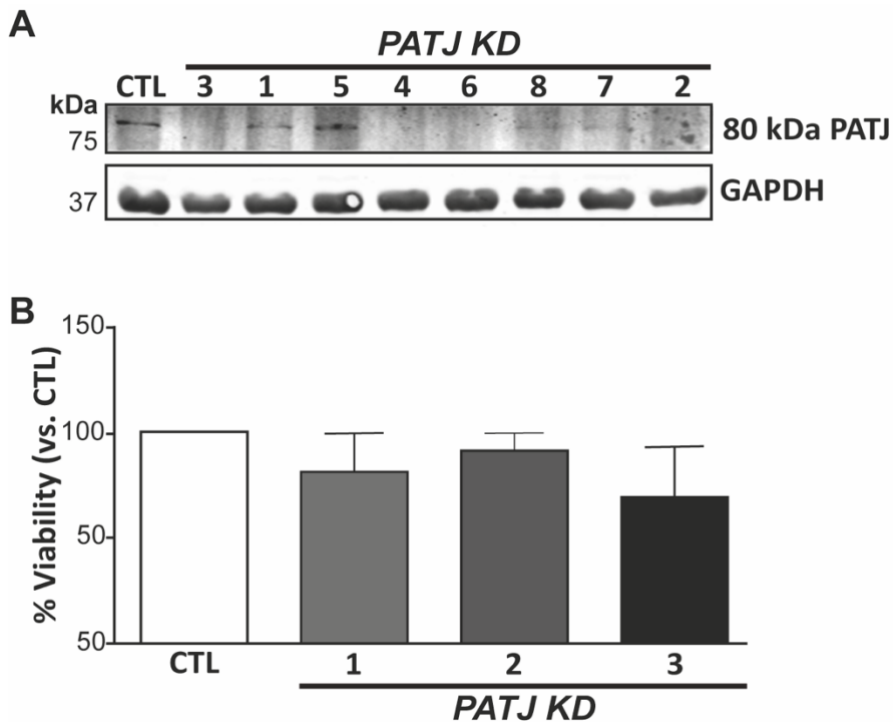

42 **Suppl. Fig. 2. Summary of Affymetrix Expression Array Results comparing hCMEC/D3 *PATJ***  
 43 **KD with CTL cells**  
 44  
 45

**KD *PATJ* vs Control**  
 • KD *PATJ*: 4 samples, Control: 4 samples  
**Filter criteria:**  
 • Fold Change: > 2 or < -2  
 • P-val: < 0.05  
**Total number of genes:** 21448  
 • Genes passed filter criteria: 341 (1.59%)  
 • Up-Regulated: 137 (40.18%)  
 • Down-Regulated: 204 (59.82%)

46

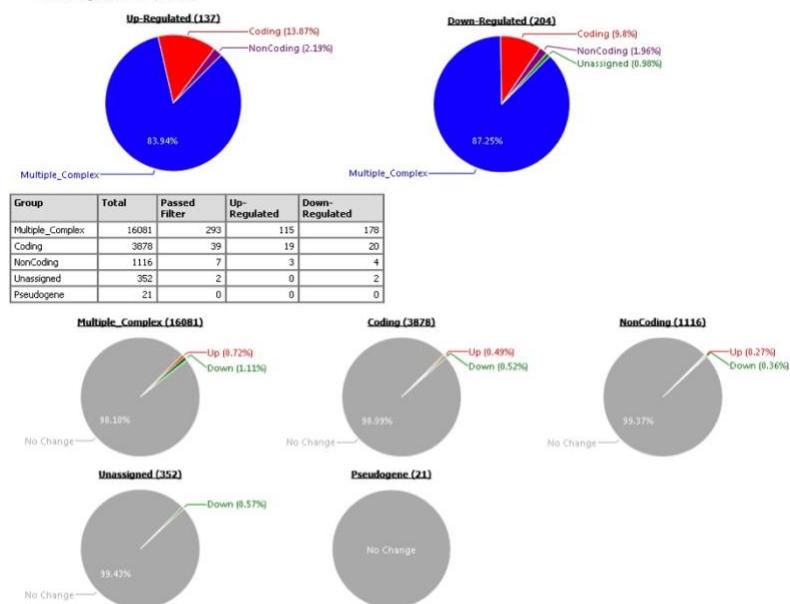

70

71 **Suppl. Fig.3:** Principal Component Analysis of the Affymetrix GeneChip Array Clarion S  
72 comparing hCMEC/D3 *PATJ* KD vs CTL cells.  
73

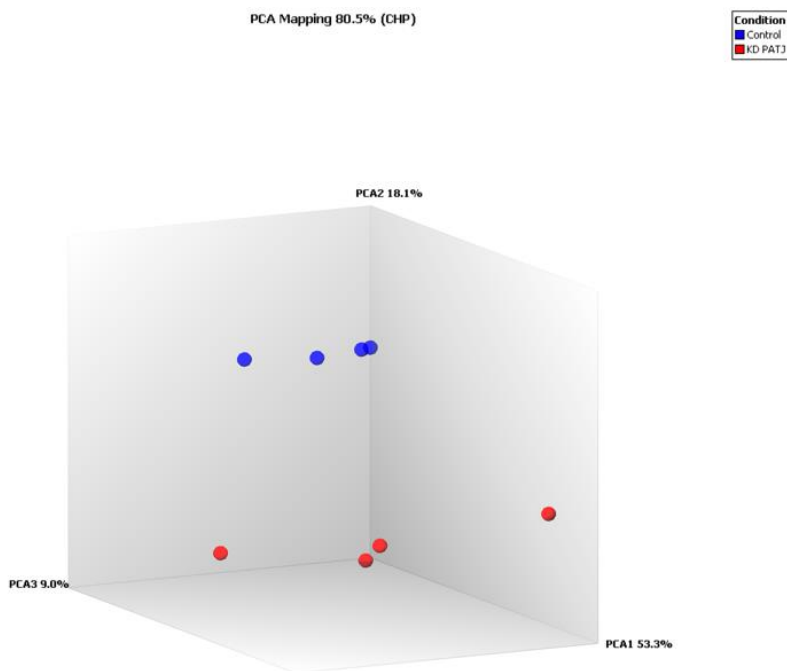

Supplement: 41420_2024_1857_MOESM2_ESM.pdf [file 41420_2024_1857_MOESM2_ESM.pdf]
